# Supplementary material for: Evaluating casein ingredients in infant formula using pigs as a model for sensitive newborn infants
Source: Royal Society of Chemistry journal article supplement (doi:10.1039/d5fo03498a), 2025-12-08
Supplement: d5fo03498a3.xlsx [file d5fo03498a3.xlsx]

## Sheet: Ark1
NEC
Pig_letter	Kill_nr.	Group	Sex	Birth_weight	Litter	Euthanized	SI prox	SI Mid	SI Dist	Stomach	Colon	SI NEC Score (highest value)	NEC incidence (score ≥4)	NEC incidence (≥3)	NEC incidence (≥2)	SINEC	ColonNEC	Stomach NEC	Mean NEC (SI, colon, Stomach)
L		CaMCI	m	1125	1	1	1	1	1	1	1	1	0	0	0	0	0	0	1
T		PMCI	f	1480	1	4				4	1	4	1	1	1	0	0	1	3
B	400-23	CaMCI	f	1338	1	10	1	1	3	1	1	3	0	1	1	1	0	0	1.66667
I	401-23	CaMCI	m	675	1	10	2	1	1	1	1	2	0	0	1	0	0	0	1.33333
A	402-23	MCI	m	1475	1	10	1	1	1	1	1	1	0	0	0	0	0	0	1
C	403-23	MCI	m	1036	1	10	3	3	2	1	3	3	0	1	1	1	1	0	2.33333
J	404-23	WPC	f	1376	1	10	1	1	1	1	1	1	0	0	0	0	0	0	1
N	405-23	WPC	f	1150	1	10	1	1	1	1	1	1	0	0	0	0	0	0	1
G	406-23	PMCI	m	1099	1	10	1	1	1	1	1	1	0	0	0	0	0	0	1
H	407-23	PMCI	m	1006	1	10	1	1	1	1	1	1	0	0	0	0	0	0	1
P	408-23	CaMCI	f	1485	1	10	1	1	1	1	1	1	0	0	0	0	0	0	1
D	409-23	MCI	f	1073	1	10	1	1	1	1	1	1	0	0	0	0	0	0	1
E	410-23	MCI	f	1233	1	10	1	1	1	1	1	1	0	0	0	0	0	0	1
O	411-23	WPC	m	1248	1	10	1	1	1	1	1	1	0	0	0	0	0	0	1
S	412-23	WPC	m	1507	1	10	1	1	1	1	1	1	0	0	0	0	0	0	1
K	413-23	PMCI	m	1341	1	10	1	1	1	1	1	1	0	0	0	0	0	0	1
Q	414-23	PMCI	m	1162	1	10	2	1	1	1	1	2	0	0	1	0	0	0	1.33333
R	415-23	CaMCI	f	1633	1	10	1	1	1	1	1	1	0	0	0	0	0	0	1
F	416-23	MCI	m	1745	1	10	2	2	1	1	1	2	0	0	1	0	0	0	1.33333
M	417-23	MCI	f	911	1	10	2	1	1	1	1	2	0	0	1	0	0	0	1.33333
V	418-23	WPC	f	925	1	10	1	1	1	1	1	1	0	0	0	0	0	0	1
X	419-23	PMCI	f	1350	1	10	1	1	1	1	1	1	0	0	0	0	0	0	1
S	420-23	PMCI	f	717	2	9	1	1	1	1	1	1	0	0	0	0	0	0	1
M	421-23	CaMCI	f	1669	2	9	1	1	1	1	1	1	0	0	0	0	0	0	1
V	422-23	WPC	f	1034	2	9	1	1	1	5	5	1	1	1	1	0	1	1	3.66667
O	423-23	MCI	f	1430	2	9	1	1	1	1	5	1	1	1	1	0	1	0	2.33333
H	424-23	MCI	f	1128	2	9	1	1	1	1	5	1	1	1	1	0	1	0	2.33333
F	425-23	PMCI	f	1139	2	10	1	1	1	1	5	1	1	1	1	0	1	0	2.33333
K	426-23	WPC	f	1336	2	10	2	1	1	1	5	2	1	1	1	0	1	0	2.66667
X	427-23	CaMCI	m	808	2	10	1	1	1	1	1	1	0	0	0	0	0	0	1
U	428-23	CaMCI	f	1302	2	10	1	1	1	1	1	1	0	0	0	0	0	0	1
A	429-23	CaMCI	f	1071	2	10	1	1	1	1	1	1	0	0	0	0	0	0	1
D	430-23	CaMCI	m	1325	2	10	1	1	1	1	1	1	0	0	0	0	0	0	1
G	431-23	MCI	f	1567	2	10	1	1	1	1	6	1	1	1	1	0	1	0	2.66667
B	432-23	WPC	m	763	2	10	3	1	1	1	5	3	1	1	1	1	1	0	3
C	433-23	WPC	f	1360	2	10	1	1	1	1	1	1	0	0	0	0	0	0	1
T	434-23	PMCI	f	1375	2	10	1	1	1	1	5	1	1	1	1	0	1	0	2.33333
Q	435-23	PMCI	f	965	2	10	2	1	1	1	1	2	0	0	1	0	0	0	1.33333
L	436-23	CaMCI	f	808	2	10	1	1	1	1	1	1	0	0	0	0	0	0	1
J	437-23	MCI	f	1660	2	10	1	1	1	1	1	1	0	0	0	0	0	0	1
I	438-23	WPC	f	1196	2	10	1	1	1	1	1	1	0	0	0	0	0	0	1
P	439-23	CaMCI	f	1409	2	10	2	1	1	1	5	2	1	1	1	0	1	0	2.66667
R	440-23	CaMCI	f	1063	2	10	1	1	1	6	6	1	1	1	1	0	1	1	4.33333
Y	441-23	MCI	f	902	2	10	1	1	1	1	1	1	0	0	0	0	0	0	1
N	442-23	WPC	m	1418	2	10	1	1	1	1	5	1	1	1	1	0	1	0	2.33333
Æ	443-23	PMCI	m	1460	2	10	1	1	1	1	5	1	1	1	1	0	1	0	2.33333
Ø	444-23	PMCI	m	1463	2	10	2	1	1	1	1	2	0	0	1	0	0	0	1.33333
Z	445-23	MCI	m	1152	2	10	3	1	1	1	1	3	0	1	1	1	0	0	1.66667
Q	446-23	WPC	m	978	3	8	1	1	1	1	1	1	0	0	0	0	0	0	1
F	447-23	CaMCI	m	978	3	8	1	1	1	1	1	1	0	0	0	0	0	0	1
M	448-23	CaMCI	m	746	3	10	1	1	1	1	5	1	1	1	1	0	1	0	2.33333
I	449-23	MCI	f	1417	3	10	3	3	4	1	1	4	1	1	1	1	0	0	2
E	450-23	WPC	m	1308	3	10	2	2	2	1	1	2	0	0	1	0	0	0	1.33333
K	451-23	WPC	f	871	3	10	1	1	1	1	1	1	0	0	0	0	0	0	1
D	452-23	PMCI	f	1120	3	10	1	1	1	1	5	1	1	1	1	0	1	0	2.33333
H	453-23	PMCI	m	1059	3	10	1	1	1	1	5	1	1	1	1	0	1	0	2.33333
J	454-23	CaMCI	f	1045	3	10	1	1	1	1	5	1	1	1	1	0	1	0	2.33333
C	455-23	MCI	m	1272	3	10	1	1	1	1	5	1	1	1	1	0	1	0	2.33333
G	456-23	MCI	f	955	3	10	4	1	1	1	5	4	1	1	1	1	1	0	3.33333
L	457-23	WPC	f	1144	3	10	3	1	1	5	5	3	1	1	1	1	1	1	4.33333
O	458-23	WPC	f	1521	3	10	1	1	1	1	1	1	0	0	0	0	0	0	1
R	459-23	PMCI	f	1315	3	10	2	1	1	1	1	2	0	0	1	0	0	0	1.33333
S	460-23	PMCI	m	886	3	10	1	1	1	1	1	1	0	0	0	0	0	0	1
A	461-23	MCI	m	790	3	10	1	1	1	1	1	1	0	0	0	0	0	0	1
N	462-23	CaMCI	f	1370	3	10	2	2	2	1	2	2	0	0	1	0	0	0	1.66667
B	463-23	MCI	f	1310	3	10	1	1	1	1	1	1	0	0	0	0	0	0	1
T	464-23	PMCI	f	1437	3	10	1	1	1	1	1	1	0	0	0	0	0	0	1
P	465-23	CaMCI	f	1652	3	10	1	1	1	5	3	1	1	1	1	0	1	1	3
